# Supplementary material for: The Metaverse in Industry 5.0: A Human-Centric Approach towards Personalized Value Creation
Source: MDPI journal article supplement (doi:10.3390/encyclopedia3030080), 2023-09-04
Supplement: s1 [file s1]

*Entry*

# The Metaverse in Industry 5.0: A Human-Centric Approach towards Personalized Value Creation

Dimitris Mourtzis\*

Laboratory for Manufacturing Systems and Automation, Department of Mechanical Engineering and Automation, University of Patras, Rio Patras, 26504, Greece; [mourtzis@lms.mech.upatras.gr](mailto:mourtzis@lms.mech.upatras.gr); Tel.: +30-2610-910-160

## Review Methodology

The Scopus database was used to extract peer-reviewed articles, supplying the essential data for the bibliometric assessment. The search query that was used for the literature search that was conducted in June 2023 was as follows:

(TITLE-ABS-KEY(*metaverse*) OR TITLE-ABS-KEY(*industrial AND metaverse*) OR TITLE-ABS-KEY(*industry 4.0*) AND TITLE-ABS-KEY(*industry 5.0*) OR TITLE-ABS-KEY(*web 4.0*) OR TITLE-ABS-KEY(*human AND centricity*) OR TITLE-ABS-KEY(*product AND service AND systems*) AND TITLE-ABS-KEY(*digital AND twins*)) AND PUBYEAR > 2018 AND (LIMIT-TO(SUBJAREA, "ENGI") OR LIMIT-TO(SUBJAREA, "COMP"))

The initial search returned a total of 171 scientific literacy articles. Among them, 59 journal articles, 73 conference papers, 7 book chapters, 16 review papers, 13 conference review, and 3 books. In addition to that and regarding the topic, most of the publications fall under the topics of Computer Science and Engineering. Subsequently, the outcome dataset was transformed into Comma Separated Values (CSV) format for further processing, with an aim to visualize and analyze its bibliometric structure. The VOSviewer software was employed for this purpose, offering the capacity to construct keyword maps based on shared networks, encompassing various items like publications, countries, journals, and co-citations. Thus, Figure S1 presents the subject areas pertaining to the overall keywords of scientific literacy.

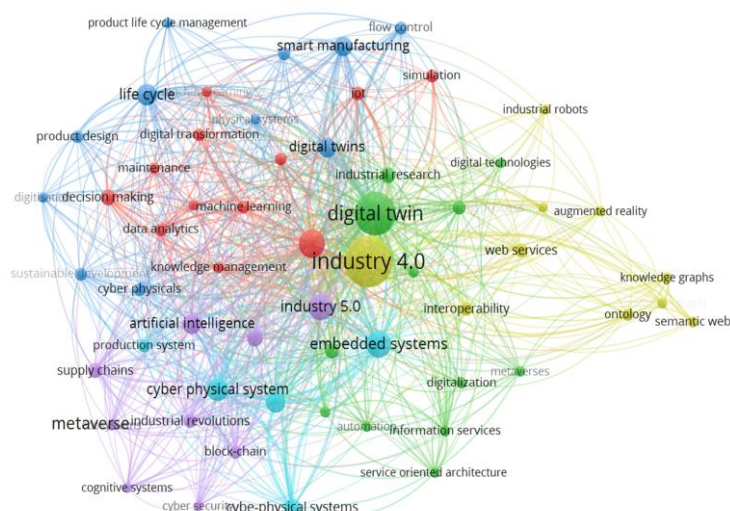

**Figure S1.** The Network Visualization of Literacy Topic Area.
